# Supplementary material
Source: PubMed Central journal article supplement (PMC4837098)

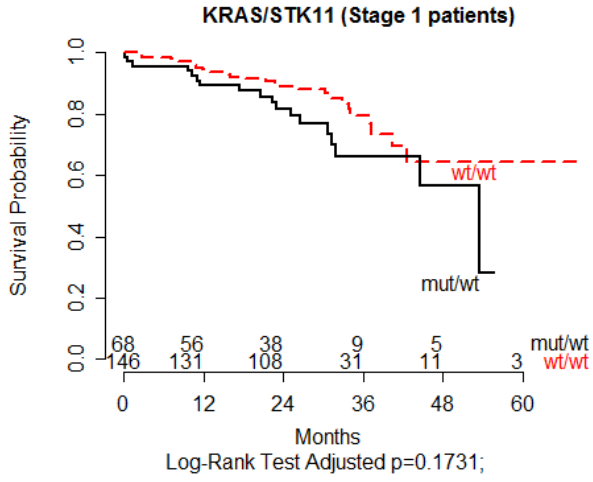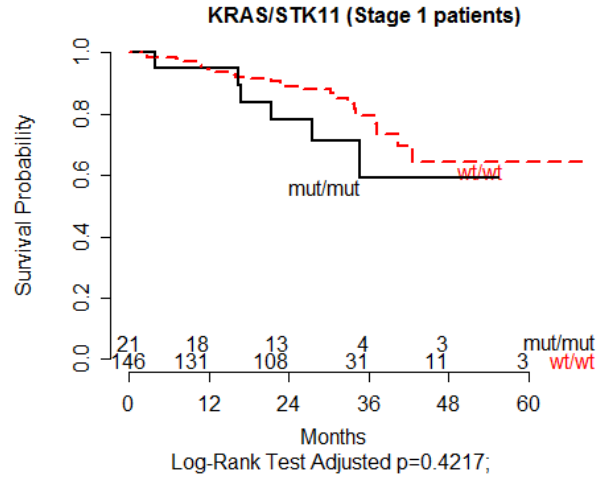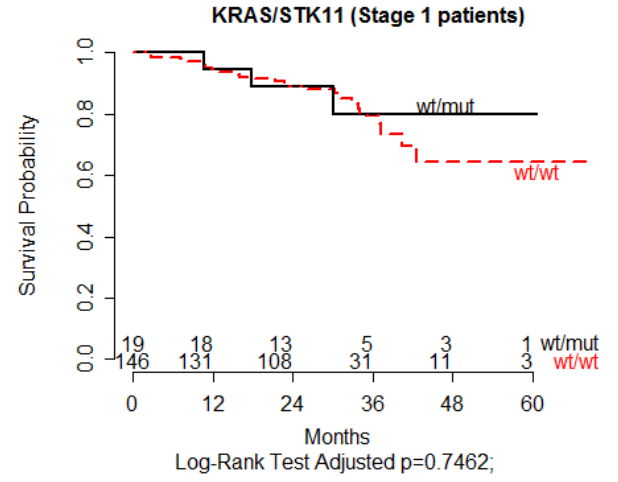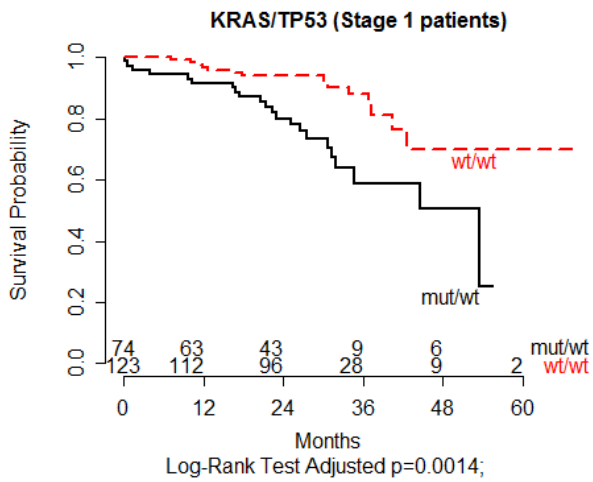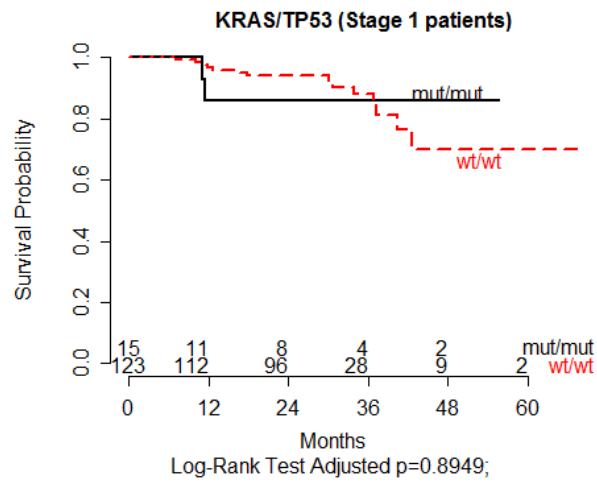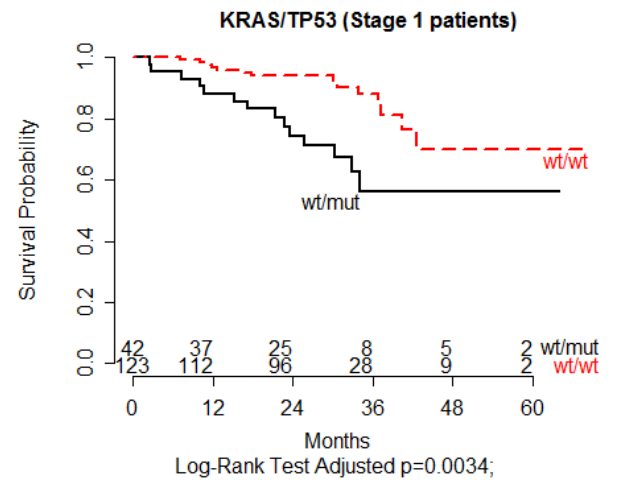

Supplement: NIHMS713206-supplement-6.pdf [file NIHMS713206-supplement-6.pdf]
